1 **Dung beetles as vertebrate samplers – a test of high throughput**  
2 **analysis of dung beetle iDNA**

3

4 Rosie Drinkwater<sup>1</sup>, Elizabeth L. Clare<sup>1</sup>, Arthur Y. C. Chung<sup>2</sup>, Stephen J. Rossiter<sup>1</sup>, Eleanor  
5 M. Slade<sup>3,4</sup>

6

7 1. School of Biological and Chemical Sciences, Queen Mary University of London,  
8 London, UK

9 2. Forest Research Centre, Forestry Department, P.O. Box 1407, 90715 Sandakan,  
10 Sabah, Malaysia

11 3. Department of Zoology, University of Oxford, South Parks Road, Oxford, UK

12 4. Asian School of the Environment, Nanyang Technological University, 50 Nanyang  
13 Avenue, Singapore City

14

15 **orcidID:**

16 Clare, E. L. - 0000-0002-6563-3365

17 Chung, A.Y.C. - 0000-0002-9529-4114

18 Rossiter, S.J. - 0000-0002-3881-4515

19 Slade, E.M. - 0000-0002-6108-1196

20

21

22 **Corresponding author:**

23 Rosie Drinkwater, [r.drinkwater@qmul.ac.uk](mailto:r.drinkwater@qmul.ac.uk), orcidID: 0000-0001-6892-1664

24 **Abstract**

25 The application of environmental DNA (eDNA) sampling in biodiversity surveys has gained  
26 widespread acceptance, especially in aquatic systems where free eDNA can be readily  
27 collected by filtering water. In terrestrial systems, eDNA-based approaches for assaying  
28 vertebrate biodiversity have tended to rely on blood-feeding invertebrates, including leeches  
29 and mosquitoes (termed invertebrate-derived DNA or iDNA). However, a key limitation of  
30 using blood-feeding taxa as samplers is that they are difficult to trap, and, in the case of  
31 leeches, are highly restricted to humid forest ecosystems. Dung beetles (superfamily  
32 Scarabaeoidea) feed on the faecal matter of terrestrial vertebrates and offer several potential  
33 benefits over blood-feeding invertebrates as samplers of vertebrate DNA. Importantly, these  
34 beetles can be easily captured in large numbers using simple, inexpensive baited traps; are  
35 globally distributed; and also occur in a wide range of biomes, allowing mammal diversity to  
36 be compared across habitats. In this exploratory study, we test the potential utility of dung  
37 beetles as vertebrate samplers by sequencing the mammal DNA contained within their guts.  
38 First, using a controlled feeding experiment, we show that mammalian DNA can be retrieved  
39 from the guts of large dung beetles (*Catharsius renaudpauliani*) for up to 10 hours after  
40 feeding. Second, by combining high-throughput sequencing of a multi-species assemblage of  
41 dung beetles with PCR replicates, we show that multiple mammal taxa can be identified with  
42 high confidence. By providing preliminary evidence that dung beetles can be used as a source  
43 of mammal DNA, our study highlights the potential for this widespread group to be used in  
44 future biodiversity monitoring surveys.

45

46 **Keywords:** Biodiversity surveys, Borneo, dung beetles, invertebrate-derived DNA,  
47 mammals, metabarcoding

## 48 **Introduction**

49

50 The development and application of molecular techniques to sequence the DNA contained  
51 within environmental samples (eDNA), including water and soil, has provided new  
52 opportunities for assaying biodiversity (Beng *et al.* 2016, Robson *et al.* 2016, Nguyen *et al.*  
53 2020). In terrestrial systems, several recent eDNA-based studies aimed at assaying vertebrate  
54 biodiversity have sequenced dietary DNA contained within the blood meals of invertebrates  
55 (iDNA) (Schnell *et al.* 2018, Fahmy *et al.* 2019), including flies (Gogarten *et al.* 2019),  
56 leeches (Tilker *et al.* 2020), and mosquitoes (Kocher *et al.* 2017).

57

58 A key limitation of using blood-feeding taxa as samplers is that they are difficult to trap.  
59 When sampling for blood-feeding leeches, collection of individuals can be opportunistic  
60 (Schnell *et al.* 2012) or, in more recent studies, by hand-searching within fixed areas (Abrams  
61 *et al.* 2019, Drinkwater *et al.* 2020). Additionally, some blood-feeding invertebrate taxa being  
62 used in these types of studies, specifically terrestrial leeches, are highly restricted to humid  
63 forest ecosystems (Borda & Siddall 2010). For example, the distribution of haemadipsid  
64 leeches with the potential for use in iDNA studies extends only across Southeast Asia, India  
65 and Madagascar (Schnell *et al.* 2018) and within these regions their occurrence is linked to  
66 humid habitats (Drinkwater *et al.* 2019).

67

68 Dung beetles (superfamily Scarabaeoidea) are a diverse and wide-ranging group, that feed  
69 primarily on the faecal matter of terrestrial vertebrates. As detritivores, dung beetles provide  
70 many crucial ecosystem functions and services, such as seed dispersal, nutrient cycling, and  
71 greenhouse gas reduction in both tropical and temperate ecosystems (Nichols *et al.* 2008).  
72 Two recent studies have demonstrated that the epithelial cells of mammals retained in the  
73 dung ingested by these beetles may, like blood meals, provide a viable source of vertebrate  
74 DNA. Gómez & Kolokotronis (2016) used Sanger sequencing to recover mammal DNA from  
75 the guts of individual dung beetles feeding on horse manure, while Kerley *et al.* (2018)  
76 successfully applied metabarcoding to retrieve mammal DNA from individual dung beetle  
77 faeces. These early findings were based on the sequencing of individual samples and imply  
78 that coprophagous insects may represent promising alternatives to blood-feeding models in  
79 iDNA studies. Adult dung beetles gain nutrition from liquid in dung by concentrating  
80 microorganisms and vertebrate cells through particle feeding (Nichols & Gómez 2014);  
81 therefore, if iDNA is to be detected in the gut, mammal epithelial cells first need to first pass  
82 through the dung beetle's filtering mouth parts. The size of particle that a beetle can ingest  
83 has been shown to be size- and species-dependent (Holter *et al.* 2002, Holter & Scholtz  
84 2007), and, as such, we might expect an effect of size on the recovery of iDNA.

85

86 As potential samplers, dung beetles offer several distinct advantages over existing blood-  
87 feeders. First, they are found in most terrestrial habitats, ranging from temperate zones to the  
88 equatorial tropics, and occur on all continents except Antarctica (Nichols & Gardner 2011).  
89 Second, dung beetles can be easily captured in large numbers using low-cost home-made  
90 traps, allowing for standardised sampling regimes (Nichols & Gardner 2011). In the Brazilian  
91 Amazon, dung beetles were identified as one of the most cost-effective taxa for biological

92 surveys and had the highest ecological indicator value (Gardner *et al.* 2008). Third, some  
93 dung beetles specialise on the dung of different mammal species or guilds (e.g., Raine &  
94 Slade 2019); thus it may be possible to use some species to detect specific mammals of  
95 interest. Conversely, by sampling multispecies assemblages of dung beetles, it should be  
96 possible to detect a range of mammal species present in an area.

97

98 Here we aim to gain a better understanding of the utility of dung beetles as iDNA samplers  
99 for biodiversity studies in the humid tropics. To this end, we (i) ascertain the time window  
100 over which mammal DNA can persist in the gut and still be recovered for amplification and  
101 sequencing. For this, we performed a field-based feeding experiment under controlled  
102 conditions, focusing on a large-bodied species, *Catharsius renaudpauliani* (Ochi & Kon),  
103 which occurs across Borneo. The duration of time over which mammal DNA can be retrieved  
104 after a feeding event has previously been characterised for leeches (Schnell *et al.* 2012) and is  
105 likely to be a key parameter in interpreting the results of any iDNA-based biodiversity  
106 assessments using dung beetles. Additionally, (ii) we apply a high-throughput DNA  
107 extraction and sequencing pipeline to pooled samples of dung beetles of different species and  
108 assess whether these multi-species assemblages can be used to assay mammal diversity. As  
109 with other iDNA studies, pooling samples before sequencing can potentially increase cost-  
110 effectiveness and maximise detection rates.

## 111 **Methods**

112

### 113 **Field-based feeding experiment**

#### 114 *Sample collection and gut dissection*

115 To measure the window of detection of mammal DNA within dung beetle guts, we  
116 constructed a controlled feeding experiment using individuals of the largest dung beetle  
117 species commonly occurring in our study area, *Catharsius renaudpauliani*. We collected 60  
118 *C. renaudpauliani* individuals from standard human dung baited live pitfall traps, which were  
119 deployed for 24 hours at multiple locations as part of another study (see Parrett *et al.* 2019 for  
120 collection details). These traps were set across a habitat gradient, from selectively logged  
121 forest to oil palm plantations within the SAFE landscape, Sabah, Malaysia (see Ewers *et al.*  
122 2011 for a full site description). Individuals were collected and maintained in sex-specific  
123 “holding” boxes, with moist sand and *ad libitum* cow dung for three days. Cow dung was  
124 used as the only non-human dung that could be obtained in bulk from nearby farms.

125

126 To measure the persistence of cow DNA in beetle guts, individual beetles were transferred to  
127 clean enclosures and starved for 48 hours to purge any dung from their guts. Twenty grams of  
128 cow dung was then introduced into the boxes and the beetles were left to feed *ad libitum* for  
129 approximately one hour, to allow all individuals the opportunity to feed. Remaining dung was  
130 then removed, and the enclosures were cleaned thoroughly. At 10 set time points (0, 1, 2, 4,  
131 6, 9, 12, 24, 48, 56 hours post feeding) six individual beetles (three females and three males)  
132 were selected *ad hoc* and frozen for at least an hour before decapitation. The length of the  
133 beetle (a proxy for beetle size) was recorded using callipers before the guts were dissected  
134 under sterile conditions placed in 3-4 times the gut volume of RNALater and stored in a  
135 freezer for DNA preservation. Very little is known of metabolism and digestion in this  
136 species, but rapid digestion of the dung was assumed, following Upadhyay (1983) who found  
137 that full digestion occurred within 48 hours in a congeneric species. We therefore used 48  
138 hours as the purging time and we aimed to maximise the number of early time points sampled  
139 post-feeding to capture patterns of DNA degradation.

140

#### 141 *Quantification of DNA*

142 DNA was extracted from all beetle guts applying the same protocol used in Drinkwater *et al.*  
143 (2018) for the extraction of iDNA from terrestrial leeches. This involved digesting each  
144 sample overnight with proteinase K and lysis buffer, then extracting the DNA using a  
145 QiaQuick purification kit (Qiagen) following manufacturers protocols with reduced  
146 centrifuge speeds (full details in Drinkwater *et al.* 2018). Quantitative PCR (qPCR) was used  
147 to determine the concentration of cow DNA detected from the beetle guts. The six DNA  
148 extracts, from three female and three male guts, from each time point were initially diluted by  
149 a factor of five to improve qPCR efficiency. qPCR reactions were then set up in a total  
150 volume of 20 $\mu$ l using SYBR green fluorescence as the marker. Each reaction consisted of  
151 10 $\mu$ l of SensiFAST mastermix (Bioline, UK), 0.8 $\mu$ l of 10 $\mu$ M primers, both forward and  
152 reverse, 7.4 $\mu$ l of ddH<sub>2</sub>O, with 1 $\mu$ l of unknown DNA template. 16s rRNA primers were used  
153 to target small fragments of mammal DNA (Taylor 1996). For quantification, we used a  
154 standard curve of eight samples of known DNA concentrations which were included in the

155 qPCR plate alongside the unknown gut samples (standard curve in figure S1). For  
156 confirmation of the identity of the qPCR product a subset of the qPCR reactions were  
157 sequenced using Sanger sequencing, and the species identified from the NCBI GenBank  
158 database with BLAST. The copy number of the samples was calculated using the equation:  
159  $10^{(CT - \text{intercept})/\text{slope}}$ , where the intercept and slope are calculated from the standard curve. The  
160 effect of time post-feeding on the number of DNA copies recovered was tested using a log-  
161 log linear regression model, with log DNA copy number as the response variable, and log  
162 time in hours (post-feeding) as the main effect. Additionally, sex and size of the beetle were  
163 included in the models.

164

## 165 **Sequencing of iDNA from multi-species assemblages**

### 166 *Sample collection*

167 We used two types of human-baited pitfall traps, deployed opportunistically in an area of  
168 continuous logged forests for 24 hours. The traps were either traditional pitfall traps, with a  
169 ball of dung held in muslin cloth suspended over the trap, used for surveying dung beetle  
170 composition (see Slade *et al.* 2011 for methods), or traps where beetles were excluded from  
171 the dung ball, using a plastic cup, a precautionary attempt at reducing contamination from  
172 human DNA.

173

174 From the pitfall traps we sampled either individuals of *Catharsius* spp. or the whole trap  
175 assemblage. We dissected the guts of 18 large *Catharsius* spp. beetles in the field. To reduce  
176 contamination risk, we performed the dissections under a covered box, ensuring dead air,  
177 wiping down surfaces with ethanol, changing gloves, and flaming scalpels. This was an  
178 initial exploration as to whether sterile dissections were possible in limited conditions,  
179 making iDNA studies more accessible and logistically easier for field ecologists. Each gut  
180 was then placed into an individual tube, containing 3-4x the gut volume of RNALater and  
181 stored in the field freezer (with approximately 10 hours of power per day). To compare these  
182 field dissections with dissections done under sterile laboratory conditions, we took a further  
183 six *Catharsius* spp. individuals from the traps and stored them whole in ethanol for gut  
184 dissection in laboratories at Queen Mary University of London, UK. Finally, the entire  
185 contents of two traps were stored in ethanol to be sequenced as an assemblage, without prior  
186 gut dissection. The 24 individual gut DNA extractions were pooled into 3 pools for  
187 sequencing (field dissected guts 2 x 6 individuals, laboratory dissection 1 x 6 individuals).  
188 The assemblage traps were split into 3 DNA extraction pools per trap. Resulting in a total of  
189 nine pools for amplification and sequencing (Table 1). All DNA extractions were conducted  
190 as above (see qPCR DNA extractions) following the extraction and sample pooling protocol  
191 used in Drinkwater *et al.*, (2018) at Queen Mary University of London.

192

**Table 1.** Summary of samples and pooling used in the study

| Sample                           | Gut dissection      | Sample storage | Samples (guts or traps) | Sequencing pools    |
|----------------------------------|---------------------|----------------|-------------------------|---------------------|
| Genus-level<br><i>Catharsius</i> | = Field<br>Malaysia | - RNA Later    | 18 guts                 | 2 pools of 6 guts   |
|                                  | Laboratory<br>UK    | - Ethanol      | 6 guts                  | 1 pool of 6 guts    |
| Assemblage-level                 | None                | Ethanol        | 2 traps                 | 3 per trap/ 6 pools |

193

#### 194 *PCR amplification and sequencing*

195 We used primers targeting mammalian 16S rRNA, which previous studies have shown to be  
196 successful for identifying mammals in leech iDNA (Taylor 1996). Following the laboratory  
197 protocols for high throughput sequencing of leech iDNA in Drinkwater *et al.* (2018) each  
198 DNA extract was amplified using uniquely tagged primers (Binladen *et al.* 2007) and,  
199 extraction blanks and negative PCR controls were included in each PCR run. The reactions  
200 consisted of 1µl of template DNA in 0.2mM of 10×buffer, 2.5mM MgCl<sub>2</sub>, 1 unit DNA  
201 polymerase (AmpliTaq Gold, Applied Biosystems), 0.2mM dNTP mix (Invitrogen),  
202 0.5mg/ml BSA, and 0.6µM of the forward and reverse primer to make a final reaction volume  
203 of 2µl. We used thermocycling conditions of 95°C for 5min, then 40 cycles of 95°C for 12s,  
204 59°C for 30s and 70°C for 20s with a final extension time of 7min at 70°C. Amplification  
205 was checked on a 1% agarose gel, successful reactions were pooled for DNA amplicon  
206 libraries (Carøe *et al.* 2017) and subjected to paired end sequencing with 150 bp Illumina  
207 MiSeq at The Genome Centre at Queen Mary University of London.

208

#### 209 *Bioinformatics and taxonomic identification*

210 We merged forward and reverse reads with AdapterRemoval version 2 (Schubert *et al.* 2016)  
211 and sorted samples by their unique 16s primer tags allowing the identification of the original  
212 sample before filtering using DAME (Zepeda Mendoza *et al.* 2016; following version updates  
213 at: <https://github.com/shyamsg/DAME>). We filtered based on length using a minimum length  
214 cut-off of 90 bp and unpaired reads were removed. We clustered the reads into operational  
215 taxonomic units (OTUs) at 97% similarity using SUMACLUSt (Mercier *et al.* 2013). OTUs  
216 were then checked for chimeras using mothur (Schloss *et al.* 2009) and further filtering of  
217 OTUs was conducted using LULU (Frøslev *et al.* 2017). OTUs were identified using a  
218 BLAST search against a customised reference database, resulting in a list of taxa for each  
219 dung beetle gut iDNA sample. The reference database contained all available 16S mammal  
220 sequences for Bornean mammals and known lab contaminants (Table S1). Where reference  
221 sequences did not exist for a species, a closely related taxon was included in the database.  
222 Due to our small sample size and the exploratory nature of the study, we present the results as  
223 descriptive data. Although read count is not a representative measure of detection due to the  
224 uneven digestion and amplification (e.g. PCR) processes (Deagle *et al.* 2018), we have  
225 included this in the summary table of detections to highlight the potential of DNA recovery  
226 (Table 3).

227 **Results**

228 *Window of DNA persistence in C. renaudpauliani guts*

229 The standard curve shows that the efficiency of the qPCR reactions ( $R^2$ ) was greater than  
230 0.99. The results of the log-linear qPCR analysis indicate a decrease in DNA copy number  
231 over time (Figure 1). This is supported by results of the simplified log-log linear model  
232 containing only (log) time post-feeding (Table 2). The model  $R^2$  value was 0.65, indicating  
233 that 65% of the variance in the DNA copy number could be explained by time. Parameter  
234 estimates from this model indicate that DNA copy number decreases with time post feeding  
235 (Figure 1, Table 2). We did not find a relationship between the weight ( $t = -1.842$ ,  $p = 0.07$ ,  $df = 4/41$ ),  
236 sex ( $t = 0.01$ ,  $p = 0.99$ ,  $df = 4/41$ ) or length ( $t = 0.84$ ,  $p = 0.40$ ,  $df = 4/41$ ) of the  
237 beetle and these terms were therefore removed.  
238

**Table 2.** Final model output for the log-log linear model of DNA copy number with time post feeding.

| Coefficient | Estimate | Standard error | t value | p value |
|-------------|----------|----------------|---------|---------|
| Intercept   | 3.79     | 0.12           | 31.07   | <0.05   |
| Log10(Time) | -1.97    | 0.12           | -16.23  | <0.05   |

239

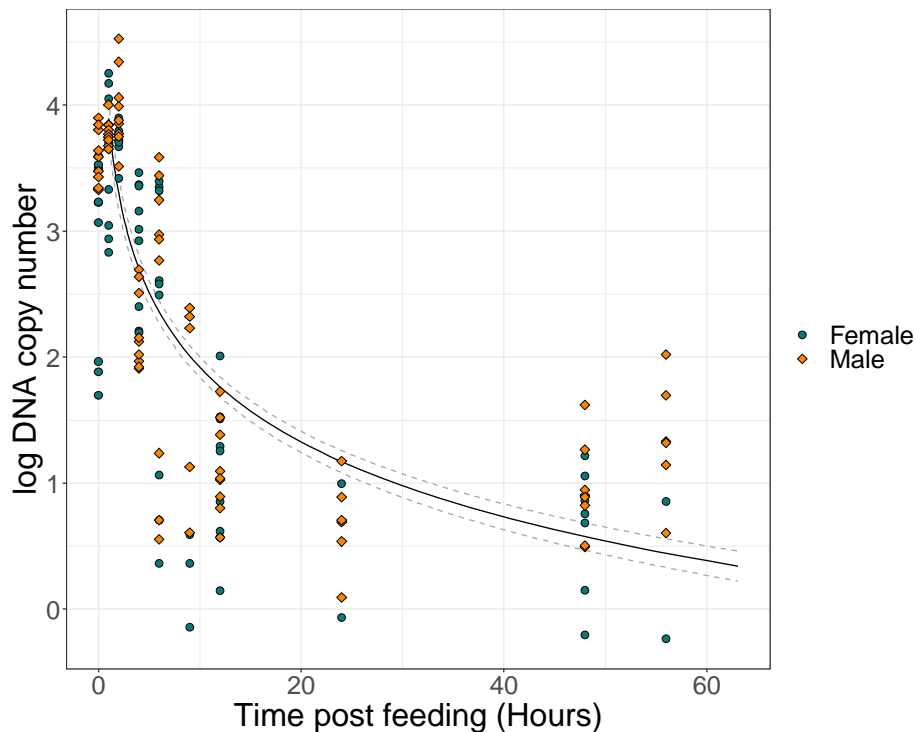

240

241

242 **Figure 1.** Comparison of log DNA copy number as a function of time post-experimental  
243 feeding. The blue circles refer to the samples from female beetles and the orange diamonds to  
244 samples from male beetles. The line represents the model fit of the log-log linear model.



245 *Identity of mammal species from dung beetle assemblages*

246 We identified six mammalian taxa in the iDNA from the beetles caught in multi-species  
247 assemblage traps (Table 3). These mammals were from five families and represented the  
248 common species in the area. The detection rate was just under 50% with four out of the nine  
249 pools sequenced resulting in detections. All traps, regardless of the modifications, generated a  
250 large amount of human DNA contamination.

251

**Table 3.** Taxa detected in the dung beetle gut iDNA (either mammal species or genus), the number of pools it was recorded in, and the DNA read count.

| <b>Common name</b> | <b>Family</b> | <b>Taxa assigned</b>       | <b>Number of pools</b> | <b>Read count</b> |
|--------------------|---------------|----------------------------|------------------------|-------------------|
| Bearded pig        | Suidae        | <i>Sus barbatus</i>        | 3                      | 14926             |
| Sambar deer        | Cervidae      | <i>Rusa unicolor</i>       | 2                      | 23455             |
| Muntjac            | Cervidae      | <i>Muntiacus</i> sp        | 1                      | 36744             |
| Mousedeer          | Tragulidae    | <i>Tragulus</i> sp         | 3                      | 36902             |
| Porcupine          | Hystricidae   | <i>Hystrix</i> sp          | 1                      | 1214              |
| Banded civet       | Viverridae    | <i>Hemigalus derbyanus</i> | 1                      | 20                |

252

253 **Discussion**

254 In this paper we have demonstrated that iDNA from mammalian sources can be recovered  
255 from the guts of tropical forest dung beetles. We achieved this using a high throughput  
256 sequencing pipeline, developed for leech-based biodiversity surveys (Drinkwater *et al.* 2018).  
257 We found that there was rapid digestion and fast passage of cow dung through beetle guts.  
258 The raw values show very high initial DNA copy number up to 2-4 hours followed by a sharp  
259 decrease to zero DNA recovery at 9 hours post feeding (Figure S2) and our model showed  
260 that there is an approximately 2% decrease in DNA copy for every 1% increase in time.

261  
262 There has been very little previous work on the digestion of dung in dung beetles, but broadly  
263 our finding corroborates that of Upadhyay (1983) who performed feeding observations and  
264 also reported a short digestion window of 48 hours in *Catharsius molossus*, a member of the  
265 same genus of large dung beetle. This is in contrast to the blood feeding leeches (*Hirudo*  
266 *medicinalis*), for which Schnell *et al.* (2012) found that iDNA could be detected for up to  
267 four months. The marked difference in the time window of detection offered by dung beetles,  
268 highlights the potential benefit of combining these two invertebrate samplers to target  
269 mammal diversity. At the same time, however, ours is a preliminary experiment conducted  
270 under field conditions in Borneo, in which cow dung was used for both the pre- and post-  
271 feeding. For this reason, we cannot rule out the possibility that cow DNA detected post-  
272 feeding could have persisted from a previous feeding event, although we experimental  
273 procedure was designed to avoid this. Indeed, we did not detect any DNA ~20 hours post-  
274 feeding and the beetles were given a 48-hour purging window once they had been exposed to  
275 the cow dung; thus, we believe that the detected DNA was the target DNA from our  
276 experimental feeding.

277  
278 Our results revealed no relationship between DNA yield and gut weight, which was  
279 supervising given that we would expect heavier guts to contain more contents and, therefore,  
280 more iDNA. Additionally, we did not find a relationship between DNA copy number and  
281 beetle length (a proxy for size). As adult dung beetles are filter feeders, we would expect the  
282 detection rate to be associated with size, as to sequence iDNA the epithelial cells from the  
283 dung source need to be able to pass through the beetle epipharynx (Holter & Scholtz 2007).  
284 Intra-specific variation within the *Catharsius* individuals we sampled may not have been  
285 variable enough to demonstrate any impact of size. However, as this is the known mechanism  
286 for feeding in adult beetles, it could be beneficial to repeat the experiment using species with  
287 a wider range of variation in body size.

288  
289 Our assays of multi-species beetle assemblages led to detection of six mammalian taxa,  
290 representing five families. Three of these could be resolved to species level, whereas three  
291 could only be confidently identified to genus, as there are two congeneric species present  
292 across the site. Additionally, given that we have now demonstrated a possible temporal  
293 threshold of DNA persistence in guts of *C. renaudpauliani*, the results suggest that when  
294 mammal DNA is detected that feeding is most likely to have occurred within four hours of  
295 being trapped. Dung beetles are attracted to fresh dung, which is removed quickly in tropical  
296 forests (with even large dung piles completely removed within 24 hours) (Slade *et al.* 2011).

297 Our findings therefore suggest that the mammals detected by iDNA were occupying the area  
298 within the temporal window of the trapping campaign. Although this requires further  
299 research, the potential to “time-stamp” iDNA detections in this way could be beneficial for  
300 conservation applications.

301

302 The most frequently detected mammals were the most common and larger bodied species.  
303 This indicates that ungulate species found in the region, such as the bearded pig, muntjac and  
304 sambar deer, may be a key dietary resource for dung beetles. In addition, *Hystrix sp* was also  
305 positively identified and could be assigned to one of two *Hystrix* species on Borneo, the  
306 endemic thick-spined porcupine or the Malay porcupine, both of which are relatively large  
307 and abundant. We also recorded the banded civet from one trap, which is a species of  
308 conservation concern due to declining population trends and is listed as near threatened on  
309 the IUCN red list (Ross *et al.* 2015). The presence of all these species have been confirmed in  
310 the area using leech-based iDNA sampling (Drinkwater *et al.* 2020). Taking these results  
311 together, our proof-of concept study clearly highlights the usefulness of combining multiple  
312 iDNA samplers, which offer the potential of targeting two different windows of detection,  
313 one short term (i.e., beetles) and one longer term (i.e., leeches). We also note that a high  
314 amount of human DNA was recovered even when using the most sterile techniques.  
315 Although some of this DNA will have arisen through laboratory or field contamination, it is  
316 likely that it may also represent true feeding events. In particular, our study was conducted in  
317 a modified landscape consisting of logged forest and oil palm agriculture, with associated  
318 human settlements and industrial infrastructure alongside a research field station. Humans  
319 could therefore represent an abundant and consistent food source for the dung beetles in this  
320 area.

321

322 Previous studies in South Africa have detected DNA from common and cryptic mammal  
323 species using shot-gun sequencing of multi-species assemblages (Gillett *et al.* 2016) and  
324 metabarcoding of iDNA from a single dung beetle species Kerley *et al.* (2018). The speed  
325 and cost-effectiveness of the field sampling using dung beetles, means that it could be  
326 beneficial to use dung beetle iDNA surveys alongside comprehensive camera trapping  
327 surveys to supplement detection data. The validation of iDNA surveys compared to camera  
328 trapping is an active area of research. The low field input of leech iDNA compared to camera  
329 trapping has been highlight before (Weiskopf *et al.* 2017). Now the focus is moving towards  
330 the development of standardised invertebrate collection methods and biodiversity analyses  
331 (Abrams *et al.* 2019, Drinkwater *et al.* 2020) allowing for greater integration of the two  
332 techniques (Tilker *et al.* 2020). Studies have shown that by combining the results of iDNA  
333 with camera traps, and using an occupancy modelling framework can increase the confidence  
334 in the estimates, therefore making the results more relevant to wild-life monitoring  
335 programmes (Abrams *et al.* 2019). In Laos and Vietnam, a combination of camera trapping  
336 and leech iDNA has been used to produce spatial maps for identifying priority areas for  
337 conservation (Tilker *et al.* 2020).

338

339 Although we mainly focused on *Catharsius*, as the largest beetles in the area, different  
340 species of dung beetles have been shown to feed on different mammal dung types (Raine &

341 Slade 2019), and so using mixed species assemblages is likely to be the best approach if  
342 using dung beetle samplers to assess the diversity of mammals in an area. *Catharsius*,  
343 however, are primarily nocturnal, and as such may feed primarily on the larger mammal dung  
344 of nocturnal animals, such as pigs, which could explain the patterns we find in the detections.  
345 As well as not recovering detections from small mammals, we also did not detect primates  
346 which again may be partially explained by the sampler species choice. The smaller, diurnal  
347 beetles in the genus *Onthophagus*, are thought to feed more on the diurnal primate dung  
348 (Slade E., pers. comm). We also found that the only detection of a banded civet was in the  
349 community trap sample, which consisted of the smaller dung beetles. This may indicate a  
350 difference in the diets of the smaller beetles, however, we would need further studies which  
351 utilise multiple beetle species, to test robustly whether they capture a different subset of the  
352 vertebrate community.

353

354 While further work is needed to assess the utility of dung beetles as iDNA samplers, our  
355 preliminary data suggest that they may have clear benefits over other invertebrate samplers  
356 for conducting low-cost standardised surveys across large areas. Notably, dung beetles occur  
357 across a wide range of biomes, and the potentially short gut retention time means the source  
358 location of any detected mammal can be more easily placed. Dung beetles are also a  
359 bioindicator taxon (Gardner *et al.* 2008), meaning there is the potential opportunity to use  
360 iDNA as a way to build quantitative networks of interactions between individual dung beetle  
361 and mammal species. Such networks have been attempted using traps baited with different  
362 mammal dung types (Raine *et al.* 2019, Ong *et al.* 2020), but these networks only show  
363 indirect interactions through the of attractiveness of dung to the beetles, rather than showing  
364 direct feeding interactions. By elucidating these direct interactions targeted dung beetle  
365 community surveys could be used to assess the health of mammal communities.

366 **Acknowledgements**

367 This study was funded by NERC Human Modified Tropical Forests program, and we would  
368 like to thank the following organisations: Sabah Biodiversity Council, Yayasan Sabah, the  
369 Sabah Forestry Department, and Benta Wawasan, for access to field sites, the Stability of  
370 Altered Forest Ecosystems (SAFE) project, Sime Darby, and the South East Asian Rainforest  
371 Research Partnership (SEARRP) for support in the field. We thank Prof Dr Henry Bernard  
372 for logistics and assistance with access, Joseph Williamson, Jonathan Parrett, Sabidee  
373 Mohd.Rizan and Herry Heroin, for setting traps and Thomas Gilbert, Ida Schnell and Kristine  
374 Bohmann for guidance and assistance in the laboratory.

375

376 **Permits**

377 Access and export permits to RD and EMS - JKM/MBS.1000□2/2 (34)  
378 JKM/MBS.1000□2/3 JLD.2 (107) and JKM/MBS.1000□2/3 JLD.3 (44))

379

380 **Data accessibility statement:**

381 Data is available on the SAFE project Zenodo repository XXXXXXXXXX. Raw sequence  
382 data is available on NCBI short read archive (bioproject accession number pending).

383 **References**

- 384 ABRAMS, J. F., L. HÖRIG, R. BROZOVIC, J. AXTNER, A. CRAMPTON, PLATT, A. MOHAMED, S.  
385 T. WONG, R. SOLLMANN, D. W. YU, and A. WILTING. 2019. Shifting up a gear with  
386 iDNA: from mammal detection events to standardized surveys. *J. Appl. Ecol.* 56:  
387 1637–1648.
- 388 BENG, K. C., K. W. TOMLINSON, X. H. SHEN, Y. SURGET-GROBA, A. C. HUGHES, R. T.  
389 CORLETT, and J. W. F. SLIK. 2016. The utility of DNA metabarcoding for studying the  
390 response of arthropod diversity and composition to land-use change in the tropics. *Sci.*  
391 *Rep.* 6: 1–13.
- 392 BINLADEN, J., M. T. P. GILBERT, J. P. BOLLBACK, F. PANITZ, C. BENDIXEN, R. NIELSEN, and  
393 E. WILLERSLEV. 2007. The use of coded PCR primers enables high-throughput  
394 sequencing of multiple homolog amplification products by 454 parallel sequencing.  
395 *PLoS One* 2: e197.
- 396 BORDA, E., and M. E. SIDDALL. 2010. Insights into the evolutionary history of Indo-Pacific  
397 bloodfeeding terrestrial leeches (Hirudinida: Arhynchobdellida: Haemadipsidae).  
398 *Invertebr. Syst.* 24: 456–472.
- 399 CARØE, C., S. GOPALAKRISHNAN, L. VINNER, S. S. T. MAK, M. H. S. SINDING, J. A.  
400 SAMANIEGO, N. WALES, T. SICHERITZ-PONTÉN, and M. T. P. GILBERT. 2017. Single-tube  
401 library preparation for degraded DNA. *Methods Ecol. Evol.* 9: 410–419.
- 402 DEAGLE, B. E., A. C. THOMAS, J. C. MCINNES, L. J. CLARKE, E. J. VESTERINEN, E. L. CLARE,  
403 T. R. KARTZINEL, and J. P. EVESON. 2018. Counting with DNA in metabarcoding  
404 studies: How should we convert sequence reads to dietary data? *Mol. Ecol.* 28: 391–406.
- 405 DRINKWATER, R., T. JUCKER, J. H. T. POTTER, T. SWINFIELD, D. A. COOMES, E. M. SLADE, M.  
406 T. P. GILBERT, O. T. LEWIS, H. BERNARD, M. J. STRUEBIG, E. L. CLARE, and S. J.  
407 ROSSITER. 2020. Leech blood-meal invertebrate-derived DNA reveals differences in  
408 Bornean mammal diversity across habitats. *Mol. Ecol.* 1–14.
- 409 DRINKWATER, R., I. B. B. SCHNELL, K. BOHMANN, H. BERNARD, G. G. G. VERON, E. CLARE,  
410 M. T. P. GILBERT, and S. J. ROSSITER. 2018. Using metabarcoding to compare the  
411 suitability of two blood-feeding leech species for sampling mammalian diversity in  
412 North Borneo. *Mol. Ecol. Resour.* 19: 105–117.
- 413 DRINKWATER, R., J. WILLIAMSON, T. SWINFIELD, N. J. DEERE, M. J. STRUEBIG, E. L. CLARE,  
414 D. COOMES, and S. J. ROSSITER. 2019. Occurrence of blood-feeding terrestrial leeches  
415 (Haemadipsidae) in a degraded forest ecosystem and their potential as ecological  
416 indicators. *Biotropica* 55: 302–312.
- 417 EWERS, R. M., R. K. DIDHAM, L. FAHRIG, G. FERRAZ, A. HECTOR, R. D. HOLT, V. KAPOS, G.  
418 REYNOLDS, W. SINUN, J. L. SNADDON, and E. C. TURNER. 2011. A large-scale forest  
419 fragmentation experiment: the Stability of Altered Forest Ecosystems Project. *Philos.*  
420 *Trans. R. Soc. B Biol. Sci.* 366: 3292–3302.
- 421 FAHMY, M., N. A. F. RAVELOMANANTSOA, S. YOUSSEF, E. HEKKALA, and M. SIDDALL. 2019.  
422 Biological inventory of Ranomafana National Park tetrapods using leech-derived iDNA.  
423 *Eur. J. Wildl. Res.* 65: 70.
- 424 FRØSLEV, T. G., R. KJØLLER, H. H. BRUUN, R. EJRNÆS, A. K. BRUNBJERG, C. PIETRONI, and  
425 A. J. HANSEN. 2017. Algorithm for post-clustering curation of DNA amplicon data  
426 yields reliable biodiversity estimates. *Nat. Commun.* 8: 1188.

- 427 GARDNER, T. A. ET AL. 2008. The cost-effectiveness of biodiversity surveys in tropical  
428 forests. *Ecol. Lett.* 11: 139–150.
- 429 GILLET, C., A. JOHNSON, I. BARR, and J. HULCR. 2016. Metagenomic sequencing of dung  
430 beetle intestinal contents directly detects and identifies mammalian fauna. *bioRxiv*  
431 074849.
- 432 GOGARTEN, J. F., C. HOFFMANN, M. ARANDJELOVIC, A. SACHSE, K. MERKEL, P. DIEGUEZ, A.  
433 AGBOR, S. ANGEDAKIN, G. BRAZZOLA, S. JONES, K. E. LANGERGRABER, K. LEE, S.  
434 MARROCOLI, M. MURAI, V. SOMMER, H. KÜHL, F. H. LEENDERTZ, and S.  
435 CALVIGNAC-SPENCER. 2019. Fly-derived DNA and camera traps are complementary  
436 tools for assessing mammalian biodiversity. *Environ. DNA* 2: 63–76.
- 437 GÓMEZ, A., and S.-O. KOLOKOTRONIS. 2016. Genetic identification of mammalian meal  
438 source in dung beetle gut contents. *Mitochondrial DNA Part A* 28: 612–615.
- 439 HOLTER, P., and C. H. SCHOLTZ. 2007. What do dung beetles eat? *Ecol. Entomol.* 32: 690–  
440 697.
- 441 HOLTER, P., C. H. SCHOLTZ, and K. G. WARDHAUGH. 2002. Dung feeding in adult  
442 scarabaeines (tunnellers and endocoprids): Even large dung beetles eat small particles.  
443 *Ecol. Entomol.* 27: 169–176.
- 444 KERLEY, G. I. H., M. LANDMAN, G. F. FICETOLA, F. BOYER, A. BONIN, D. RIOUX, P.  
445 TABERLET, and E. COISSAC. 2018. Diet shifts by adult flightless dung beetles *Circellium*  
446 *bacchus*, revealed using DNA metabarcoding, reflect complex life histories. *Oecologia*  
447 188: 107–115.
- 448 KOCHER, A., B. DE THOISY, F. CATZEFLIS, S. VALIÈRE, A.-L. L. BAÑULS, J. MURIENNE, S.  
449 VALIERE, A.-L. L. BAÑULS, and J. MURIENNE. 2017. iDNA screening: disease vectors as  
450 vertebrate samplers. *Mol. Ecol.* 26: 6478–6486.
- 451 MERCIER, C., F. BOYER, A. BONIN, and E. COISSAC. 2013. SUMATRA and SUMACLUSTR:  
452 fast and exact comparison and clustering of sequences. *In* Programs and Abstracts of the  
453 SeqBio workshop. pp. 27–29.
- 454 NGUYEN, B. N., E. W. SHEN, J. SEEMANN, A. M. S. CORREA, J. L. O'DONNELL, A. H. ALTIERI,  
455 N. KNOWLTON, K. A. CRANDALL, S. P. EGAN, W. O. McMILLAN, and M. LERAY. 2020.  
456 Environmental DNA survey captures patterns of fish and invertebrate diversity across a  
457 tropical seascape. *Sci. Rep.* 10: 1–14.
- 458 NICHOLS, E., and A. GÓMEZ. 2014. Dung beetles and fecal helminth transmission: Patterns,  
459 mechanisms and questions. *Parasitology* 141: 614–623.
- 460 NICHOLS, E. S., and T. A. GARDNER. 2011. Dung Beetles as a Candidate Study Taxon in  
461 Applied Biodiversity Conservation Research. *Ecol. Evol. Dung Beetles* 267–291.
- 462 NICHOLS, E., S. SPECTOR, J. LOUZADA, T. LARSEN, S. AMEZQUITA, and M. E. FAVILA. 2008.  
463 Ecological functions and ecosystem services provided by Scarabaeinae dung beetles.  
464 *Biol. Conserv.* 141: 1461–1474.
- 465 ONG, X. R., E. M. SLADE, and M. L. M. LIM. 2020. Dung beetle-megafauna trophic networks  
466 in Singapore's fragmented forests. *Biotropica* 52: 818–824.
- 467 PARRETT, J. M., D. J. MANN, A. Y. C. CHUNG, E. M. SLADE, and R. J. KNELL. 2019. Sexual  
468 selection predicts the persistence of populations within altered environments. *Ecol. Lett.*  
469 22: 1629–1637.
- 470 RAINE, E. H., S. B. MIKICH, O. T. LEWIS, and E. M. SLADE. 2019. Interspecific and

- 471 intraspecific variation in diet preference in five Atlantic forest dung beetle species. *Ecol.*  
472 *Entomol.* 44: 436–439.
- 473 RAINE, E. H., and E. M. SLADE. 2019. Dung beetle–mammal associations: methods, research  
474 trends and future directions. *Proc. R. Soc. B Biol. Sci.* 286: 20182002.
- 475 ROBSON, H. L. A., T. H. NOBLE, R. J. SAUNDERS, S. K. A. ROBSON, D. W. BURROWS, and D.  
476 R. JERRY. 2016. Fine-tuning for the tropics: application of eDNA technology for  
477 invasive fish detection in tropical freshwater ecosystems. *Mol. Ecol. Resour.* 16: 922–  
478 932.
- 479 ROSS, J., J. BRODIE, S. CHEYNE, W. CHUTIPONG, L. HEDGES, A. HEARN, M. LINKIE, B.  
480 LOKEN, J. MATHAI, J. MCCARTHY, D. NGOPRASERT, N. TANTIPISANUH, A. WILTING, and  
481 I. A. HAIDIR. 2015. *Hemigalus derbyanus*. IUCN Red List Threat. Species 2015.  
482 Available at: <https://dx.doi.org/10.2305/IUCN.UK.2015-4.RLTS.T41689A45216918.en>  
483 [Accessed February 9, 2021].
- 484 SCHLOSS, P. D., S. L. WESTCOTT, T. RYABIN, J. R. HALL, M. HARTMANN, E. B. HOLLISTER, R.  
485 A. LESNIEWSKI, B. B. OAKLEY, D. H. PARKS, C. J. ROBINSON, J. W. SAHL, B. STRES, G.  
486 G. THALLINGER, D. J. VAN HORN, and C. F. WEBER. 2009. Introducing mothur: Open-  
487 source, platform-independent, community-supported software for describing and  
488 comparing microbial communities. *Appl. Environ. Microbiol.* 75: 7537–7541.
- 489 SCHNELL, I. B. ET AL. 2012. Screening mammal biodiversity using dna from leeches. *Curr.*  
490 *Biol.* 22: R262–R263.
- 491 SCHNELL, I. B. ET AL. 2018. Debugging diversity - a global scale exploration of the potential  
492 of terrestrial bloodfeeding leeches as a vertebrate monitoring tool. *Mol. Ecol. Resour.*  
493 18: 1282–1298.
- 494 SCHUBERT, M., S. LINDGREEN, and L. ORLANDO. 2016. AdapterRemoval v2: rapid adapter  
495 trimming, identification, and read merging. *BMC Res. Notes* 9: 1–7.
- 496 SLADE, E. M., D. J. MANN, and O. T. LEWIS. 2011. Biodiversity and ecosystem function of  
497 tropical forest dung beetles under contrasting logging regimes. *Biol. Conserv.* 144: 166–  
498 174.
- 499 TAYLOR, P. G. 1996. Reproducibility of Ancient DNA Sequences from Extinct Pleistocene  
500 Fauna. *Mol. Biol. Evol.* 13: 283–285.
- 501 TILKER, A., J. F. ABRAMS, A. NGUYEN, L. HÖRIG, J. AXTNER, J. LOUVRIER, B. M. RAWSON,  
502 H. A. Q. NGUYEN, F. GUEGAN, T. VAN NGUYEN, M. LE, R. SOLLMANN, and A. WILTING.  
503 2020. Identifying conservation priorities in a defaunated tropical biodiversity hotspot.  
504 *Divers. Distrib.* 26: 426–440.
- 505 UPADHYAY, V. B. 1983. Movement of food through the gut of *Catharsius molossus*  
506 (Coleoptera: Scarabaeidae). *Acta Physiol. Hung.* 61: 185–189.
- 507 WEISKOPF, S. R., K. P. MCCARTHY, M. TESSLER, H. A. RAHMAN, J. L. MCCARTHY, R.  
508 HERSCH, M. M. FAISAL, and M. E. SIDDALL. 2017. Using terrestrial haematophagous  
509 leeches to enhance tropical biodiversity monitoring programmes in Bangladesh. *J. Appl.*  
510 *Ecol.* 55: 2071–2081.
- 511 ZEPEDA MENDOZA, M. L., K. BOHMANN, A. CARMONA BAEZ, and M. T. P. GILBERT. 2016.  
512 DAME: A toolkit for the initial processing of datasets with PCR replicates of double-  
513 tagged amplicons for DNA metabarcoding analyses. *BMC Res. Notes* 9: 1–13.
- 514
